# Supplementary material for: Integrating Smart Health in the US Health Care System: Infodemiology Study of Asthma Monitoring in the Google Era
Source: PubMed Central journal article supplement (PMC5869181; doi:10.2196/publichealth.8726), 2018-03-12
Supplement: publichealth_v4i1e24_app1.pdf [file publichealth_v4i1e24_app1.pdf]

## Multimedia Appendix 1: State data tables

Table A1 consists of the States by declining interest in the term 'Asthma' from 2004 to 2015, Table A2 consists of the normalized values for the online interest by State for each year from 2004 to 2015, and Tables A3 and A4 present the smoothing parameters and coefficients for the Holt-Winters forecasting by State, respectively.

**Table A1.** Online Interest for 'Asthma' by State in USA from January 2004 to December 2015

| State          | Score | State                | Score | State         | Score | State      | Score |
|----------------|-------|----------------------|-------|---------------|-------|------------|-------|
| Delaware       | 100   | South Carolina       | 89    | Massachusetts | 81    | Arizona    | 78    |
| West Virginia  | 97    | Indiana              | 88    | Oklahoma      | 81    | Wisconsin  | 77    |
| North Carolina | 95    | Colorado             | 87    | New Jersey    | 81    | Texas      | 76    |
| Kentucky       | 95    | Alabama              | 87    | Montana       | 80    | Hawaii     | 73    |
| Maine          | 94    | Georgia              | 86    | Washington    | 80    | Utah       | 72    |
| Tennessee      | 93    | South Dakota         | 86    | New York      | 80    | Iowa       | 72    |
| Connecticut    | 92    | New Mexico           | 85    | Kansas        | 79    | Louisiana  | 71    |
| Maryland       | 92    | Vermont              | 85    | Alaska        | 79    | Florida    | 69    |
| Mississippi    | 92    | Missouri             | 85    | New Hampshire | 78    | Nevada     | 67    |
| Pennsylvania   | 91    | Minnesota            | 84    | Ohio          | 78    | California | 67    |
| Nebraska       | 91    | Arkansas             | 84    | North Dakota  | 78    | Virginia   | 61    |
| Idaho          | 89    | District of Columbia | 83    | Wyoming       | 78    | Oregon     | 55    |
| Rhode Island   | 89    | Michigan             | 83    | Illinois      | 78    |            |       |

**Table A2.** Online Interest for 'Asthma' by State by Year from 2004 to 2015

| State          | 2004 | 2005 | 2006 | 2007 | 2008 | 2009 | 2010 | 2011 | 2012 | 2013 | 2014 | 2015 |
|----------------|------|------|------|------|------|------|------|------|------|------|------|------|
| Alabama        | 38   | 58   | 76   | 50   | 52   | 73   | 80   | 83   | 90   | 77   | 82   | 88   |
| Alaska         | 67   | 73   | 100  | 52   | 44   | 77   | 70   | 88   | 86   | 86   | 79   | 93   |
| Arizona        | 48   | 52   | 58   | 39   | 47   | 67   | 64   | 72   | 83   | 66   | 70   | 78   |
| Arkansas       | 45   | 76   | 80   | 51   | 54   | 63   | 74   | 85   | 82   | 80   | 78   | 79   |
| California     | 40   | 45   | 53   | 35   | 36   | 44   | 37   | 61   | 65   | 56   | 57   | 63   |
| Colorado       | 48   | 54   | 62   | 52   | 53   | 73   | 75   | 83   | 87   | 73   | 72   | 81   |
| Connecticut    | 54   | 63   | 76   | 48   | 59   | 81   | 75   | 93   | 91   | 78   | 87   | 90   |
| Delaware       | 78   | 79   | 95   | 100  | 100  | 100  | 82   | 93   | 95   | 100  | 100  | 100  |
| DC             | 52   | 52   | 68   | 43   | 45   | 68   | 64   | 78   | 82   | 71   | 74   | 78   |
| Florida        | 37   | 41   | 49   | 34   | 40   | 57   | 55   | 65   | 68   | 56   | 61   | 65   |
| Georgia        | 48   | 54   | 67   | 50   | 51   | 73   | 68   | 83   | 89   | 73   | 71   | 79   |
| Hawaii         | 58   | 62   | 52   | 43   | 48   | 63   | 67   | 71   | 80   | 62   | 64   | 66   |
| Idaho          | 81   | 73   | 65   | 52   | 58   | 89   | 77   | 95   | 97   | 80   | 87   | 85   |
| Illinois       | 52   | 56   | 67   | 42   | 49   | 69   | 64   | 69   | 75   | 64   | 66   | 72   |
| Indiana        | 59   | 69   | 82   | 45   | 51   | 77   | 71   | 81   | 88   | 70   | 76   | 78   |
| Iowa           | 55   | 62   | 68   | 43   | 47   | 75   | 73   | 73   | 75   | 61   | 60   | 67   |
| Kansas         | 51   | 57   | 68   | 47   | 48   | 64   | 77   | 79   | 85   | 69   | 67   | 62   |
| Kentucky       | 67   | 72   | 79   | 52   | 64   | 94   | 80   | 96   | 98   | 83   | 83   | 94   |
| Louisiana      | 64   | 49   | 63   | 40   | 44   | 58   | 57   | 69   | 71   | 59   | 61   | 63   |
| Maine          | 58   | 83   | 88   | 66   | 56   | 83   | 83   | 99   | 100  | 89   | 93   | 87   |
| Maryland       | 53   | 58   | 78   | 52   | 55   | 85   | 82   | 82   | 85   | 74   | 77   | 91   |
| Massachusetts  | 57   | 55   | 69   | 45   | 54   | 73   | 67   | 77   | 79   | 68   | 71   | 80   |
| Michigan       | 44   | 59   | 72   | 49   | 53   | 73   | 68   | 79   | 76   | 68   | 68   | 77   |
| Minnesota      | 51   | 62   | 74   | 47   | 52   | 75   | 78   | 78   | 81   | 69   | 72   | 78   |
| Mississippi    | 54   | 83   | 68   | 41   | 45   | 65   | 64   | 84   | 92   | 75   | 79   | 99   |
| Missouri       | 56   | 59   | 71   | 46   | 52   | 75   | 73   | 80   | 80   | 68   | 69   | 81   |
| Montana        | 49   | 62   | 81   | 56   | 47   | 81   | 67   | 95   | 89   | 81   | 77   | 81   |
| Nebraska       | 78   | 73   | 79   | 49   | 55   | 87   | 80   | 87   | 98   | 79   | 85   | 86   |
| Nevada         | 39   | 42   | 51   | 35   | 44   | 64   | 59   | 60   | 65   | 65   | 61   | 68   |
| New Hampshire  | 60   | 49   | 78   | 41   | 50   | 69   | 68   | 79   | 79   | 67   | 67   | 82   |
| New Jersey     | 51   | 56   | 66   | 41   | 47   | 67   | 63   | 76   | 78   | 69   | 71   | 75   |
| New Mexico     | 75   | 69   | 64   | 47   | 61   | 79   | 95   | 76   | 86   | 77   | 74   | 85   |
| New York       | 49   | 57   | 65   | 46   | 49   | 69   | 64   | 70   | 77   | 66   | 65   | 72   |
| North Carolina | 55   | 63   | 79   | 51   | 62   | 85   | 82   | 91   | 95   | 82   | 80   | 82   |
| North Dakota   | 91   | 91   | 94   | 54   | 69   | 99   | 79   | 86   | 85   | 84   | 73   | 74   |
| Ohio           | 48   | 54   | 68   | 44   | 46   | 68   | 68   | 73   | 78   | 66   | 67   | 72   |
| Oklahoma       | 46   | 64   | 63   | 46   | 48   | 62   | 71   | 77   | 87   | 72   | 71   | 74   |
| Oregon         | 48   | 50   | 68   | 43   | 50   | 71   | 69   | 74   | 79   | 46   | 34   | 38   |
| Pennsylvania   | 52   | 61   | 74   | 48   | 55   | 75   | 75   | 88   | 91   | 78   | 77   | 84   |
| Rhode Island   | 64   | 49   | 80   | 52   | 61   | 72   | 84   | 94   | 93   | 85   | 84   | 89   |
| South Carolina | 61   | 54   | 73   | 46   | 51   | 82   | 70   | 77   | 89   | 80   | 78   | 79   |
| South Dakota   | 100  | 97   | 89   | 57   | 64   | 73   | 71   | 88   | 96   | 70   | 80   | 98   |
| Tennessee      | 48   | 58   | 70   | 45   | 48   | 76   | 76   | 87   | 96   | 78   | 81   | 88   |
| Texas          | 45   | 52   | 64   | 41   | 47   | 64   | 60   | 70   | 73   | 63   | 66   | 70   |
| Utah           | 43   | 52   | 66   | 37   | 42   | 53   | 59   | 70   | 69   | 65   | 66   | 67   |
| Vermont        | 63   | 95   | 74   | 67   | 44   | 70   | 55   | 93   | 85   | 91   | 76   | 92   |
| Virginia       | 40   | 48   | 63   | 40   | 35   | 37   | 33   | 76   | 82   | 67   | 55   | 53   |
| Washington     | 46   | 52   | 65   | 46   | 51   | 70   | 66   | 78   | 77   | 70   | 68   | 74   |
| West Virginia  | 86   | 81   | 67   | 75   | 69   | 95   | 100  | 100  | 98   | 94   | 81   | 93   |
| Wisconsin      | 57   | 61   | 71   | 43   | 50   | 67   | 71   | 74   | 73   | 64   | 63   | 68   |
| Wyoming        | 85   | 100  | 88   | 50   | 55   | 52   | 84   | 91   | 86   | 90   | 78   | 80   |

**Table A3. Smoothing Parameters for the Holt-Winters' Forecasting by State**

| <b>State</b>         | <b>alpha (<math>\alpha</math>)</b> | <b>beta (<math>\beta^*</math>)</b> | <b>gamma (<math>\gamma</math>)</b> |
|----------------------|------------------------------------|------------------------------------|------------------------------------|
| Alabama              | 0.1050                             | 0.0162                             | 0.7013                             |
| Alaska               | 0.0491                             | 0.0877                             | 0.4980                             |
| Arizona              | 0.1491                             | 0.0381                             | 0.4310                             |
| Arkansas             | 0.0426                             | 0.0882                             | 0.6637                             |
| California           | 0.2817                             | 0.0000                             | 0.6552                             |
| Colorado             | 0.0685                             | 0.0000                             | 0.3896                             |
| Connecticut          | 0.1059                             | 0.0000                             | 0.4359                             |
| Delaware             | 0.1665                             | 0.0208                             | 0.4038                             |
| District of Columbia | 0.0923                             | 0.0000                             | 0.5157                             |
| Florida              | 0.1447                             | 0.0195                             | 0.6686                             |
| Georgia              | 0.2049                             | 0.0321                             | 0.4613                             |
| Hawaii               | 0.0146                             | 0.6730                             | 0.6628                             |
| Idaho                | 0.0090                             | 1.0000                             | 0.5640                             |
| Illinois             | 0.1829                             | 0.0274                             | 0.4946                             |
| Indiana              | 0.0525                             | 0.0334                             | 0.5058                             |
| Iowa                 | 0.1160                             | 0.0540                             | 0.5406                             |
| Kansas               | 0.0701                             | 0.0122                             | 0.4871                             |
| Kentucky             | 0.0604                             | 0.0494                             | 0.4764                             |
| Louisiana            | 0.0893                             | 0.1310                             | 0.4797                             |
| Maine                | 0.0274                             | 0.1580                             | 0.3866                             |
| Maryland             | 0.0263                             | 0.0000                             | 0.4569                             |
| Massachusetts        | 0.0841                             | 0.0554                             | 0.5767                             |
| Michigan             | 0.1009                             | 0.0239                             | 0.6195                             |
| Minnesota            | 0.1291                             | 0.0088                             | 0.5211                             |
| Mississippi          | 0.1009                             | 0.0000                             | 0.6027                             |
| Missouri             | 0.0972                             | 0.0000                             | 0.5170                             |
| Montana              | 0.0954                             | 0.0783                             | 0.3634                             |
| Nebraska             | 0.0566                             | 0.1721                             | 0.2803                             |
| Nevada               | 0.0321                             | 0.0490                             | 0.6138                             |
| New Hampshire        | 0.0902                             | 0.0775                             | 0.4581                             |
| New Jersey           | 0.1657                             | 0.0260                             | 0.4642                             |
| New Mexico           | 0.1470                             | 0.0072                             | 0.3644                             |
| New York             | 0.1818                             | 0.0245                             | 0.5085                             |
| North Carolina       | 0.1209                             | 0.0098                             | 0.4294                             |
| North Dakota         | 0.0459                             | 0.0485                             | 0.4518                             |
| Ohio                 | 0.0997                             | 0.1281                             | 0.3487                             |
| Oklahoma             | 0.2460                             | 0.0389                             | 0.5948                             |
| Oregon               | 0.1868                             | 0.0000                             | 0.5835                             |
| Pennsylvania         | 0.1784                             | 0.0215                             | 0.5000                             |
| Rhode Island         | 0.1205                             | 0.0124                             | 0.5135                             |
| South Carolina       | 0.0805                             | 0.0851                             | 0.2857                             |
| South Dakota         | 0.1044                             | 0.0957                             | 0.4531                             |
| Tennessee            | 0.0779                             | 0.0372                             | 0.5314                             |
| Texas                | 0.1822                             | 0.0000                             | 0.4703                             |
| Utah                 | 0.0448                             | 0.0430                             | 0.4546                             |
| Vermont              | 0.0945                             | 0.0330                             | 0.4606                             |
| Virginia             | 0.5253                             | 0.0000                             | 0.8483                             |
| Washington           | 0.1281                             | 0.0209                             | 0.4646                             |
| West Virginia        | 0.0755                             | 0.0453                             | 0.4634                             |
| Wisconsin            | 0.1103                             | 0.0241                             | 0.6439                             |
| Wyoming              | 0.0826                             | 0.1182                             | 0.4289                             |

**Table A4. Coefficients for the Holt-Winters' Forecastings by State**

|    | a     | b     | s1     | s2    | s3    | s4    | s5    | s6     | s7     | s8     | s9    | s10   | s11   | s12    |
|----|-------|-------|--------|-------|-------|-------|-------|--------|--------|--------|-------|-------|-------|--------|
| AL | 27.42 | -0.03 | 6.89   | 8.01  | 7.80  | 8.62  | 3.85  | 5.88   | -0.34  | 2.91   | 5.36  | 12.26 | 2.44  | 4.88   |
| AK | 40.03 | 0.25  | 18.27  | 5.19  | 1.36  | 12.3  | 22.14 | 6.02   | 5.59   | 5.90   | 8.89  | 8.78  | 13.97 | 3.01   |
| AZ | 69.21 | 0.15  | 10.48  | 19.51 | 9.27  | 14.7  | 0.40  | -3.72  | -10.33 | -0.01  | -2.12 | 8.94  | 5.75  | 6.45   |
| AR | 32.11 | 0.08  | 11.38  | 10.28 | 8.23  | 11.0  | 2.22  | -1.70  | 2.75   | -1.77  | 14.8  | 7.41  | 8.68  | 1.56   |
| CA | 67.85 | 0.11  | 4.71   | 1.43  | 4.29  | 4.19  | 2.15  | -10.63 | -13.96 | -12.67 | -5.53 | -1.71 | -0.40 | -3.70  |
| CO | 54.69 | -0.08 | -2.42  | 4.61  | 8.37  | 9.81  | 4.61  | -0.35  | -1.59  | 1.27   | 3.21  | 5.99  | 0.83  | -2.45  |
| CT | 58.75 | 0.01  | -2.08  | 0.88  | 0.08  | 7.65  | 0.51  | -3.06  | -8.06  | -7.41  | 3.88  | 1.24  | -1.54 | -4.23  |
| DC | 58.46 | -0.09 | -2.35  | -3.71 | 0.45  | 4.03  | 7.67  | -6.60  | -6.42  | -3.51  | 1.25  | 2.11  | -4.05 | 2.25   |
| DE | 21.62 | -0.15 | 3.10   | 6.64  | 7.49  | 4.81  | 6.08  | 3.14   | 4.57   | 3.89   | 7.41  | 9.57  | 4.92  | 8.63   |
| FL | 70.72 | 0.06  | -3.60  | -0.12 | -0.05 | -2.19 | -6.04 | -8.45  | -8.75  | -10.65 | -4.73 | -0.48 | -1.97 | -7.95  |
| GA | 71.98 | 0.10  | -5.87  | -3.70 | 6.21  | 11.0  | -4.32 | -10.44 | -9.74  | -6.82  | -1.93 | -0.18 | -1.72 | -5.00  |
| HI | 15.87 | 0.06  | 4.97   | 9.97  | 10.18 | 9.70  | 2.19  | 6.44   | 2.52   | 0.43   | 8.84  | 7.21  | 2.48  | 5.21   |
| ID | 28.41 | 0.01  | 2.77   | 1.29  | 5.85  | 5.20  | 3.58  | 2.32   | 3.66   | 6.95   | 8.46  | 9.85  | 4.85  | 2.67   |
| IL | 55.00 | 0.00  | 0.57   | 1.09  | 2.85  | 7.97  | 4.34  | -2.93  | -2.40  | -2.49  | 4.16  | 10.01 | 5.10  | -1.56  |
| IN | 60.80 | -0.02 | -2.92  | -5.85 | 0.56  | 6.84  | -1.90 | -9.62  | -13.63 | -6.00  | -0.92 | 2.18  | -1.71 | -6.39  |
| IA | 35.73 | 0.06  | -8.69  | -6.07 | 1.02  | -1.72 | -2.74 | -8.36  | -8.67  | -7.87  | -5.42 | -0.24 | -6.21 | -6.19  |
| KS | 29.79 | -0.13 | 2.03   | 5.58  | 6.96  | 7.19  | 4.50  | 4.38   | -0.43  | 6.63   | 6.57  | 10.74 | 0.60  | -7.72  |
| KY | 39.66 | 0.04  | 5.51   | 3.14  | 4.30  | 5.31  | 6.17  | 2.29   | 4.65   | 2.76   | 9.29  | 6.25  | 6.65  | 0.89   |
| LA | 38.63 | -0.05 | 8.32   | 9.87  | 11.57 | 6.96  | 2.77  | 0.58   | -4.60  | 3.40   | 1.11  | 10.80 | 8.72  | -0.06  |
| ME | 52.14 | 0.12  | 7.53   | 5.14  | 17.53 | 11.5  | 5.48  | 1.57   | -5.89  | -1.72  | 9.17  | 12.08 | 13.91 | 7.92   |
| MD | 64.07 | 0.01  | -4.38  | -2.99 | -1.80 | 7.94  | 1.47  | -10.15 | -5.29  | -8.14  | 2.58  | 5.83  | 2.85  | -3.81  |
| MA | 45.67 | 0.05  | 2.61   | 3.99  | 5.96  | 6.61  | 8.90  | -1.26  | -3.03  | -1.90  | 7.41  | 6.26  | 6.35  | 3.95   |
| MI | 64.56 | 0.04  | -8.75  | -3.33 | 0.59  | 2.26  | -1.66 | -6.55  | -13.19 | -11.45 | -2.61 | -0.14 | -4.01 | -4.58  |
| MN | 56.21 | -0.19 | 4.86   | 8.46  | 4.26  | 11.8  | 8.08  | -1.28  | -3.49  | -1.41  | 7.16  | 11.42 | 7.37  | 5.21   |
| MS | 43.92 | -0.22 | -0.27  | 2.54  | 11.47 | 14.9  | 3.34  | -5.71  | 0.86   | -1.29  | 1.73  | 15.53 | 4.36  | -0.29  |
| MO | 61.87 | 0.01  | 0.02   | -1.09 | -3.40 | 4.83  | -0.57 | -8.90  | -9.70  | -7.99  | -1.50 | 2.06  | -1.30 | -3.40  |
| MT | 41.50 | -0.04 | 0.46   | 7.20  | 10.72 | 4.97  | 6.30  | 6.63   | 2.03   | -1.68  | 10.6  | 5.85  | 2.58  | 1.58   |
| NE | 41.78 | 0.18  | -2.37  | 2.35  | 3.91  | 9.18  | 3.38  | -1.05  | 2.72   | 3.74   | 3.91  | 6.07  | -0.02 | -2.02  |
| NV | 35.65 | 0.08  | 13.62  | 21.59 | 19.62 | 14.7  | 11.32 | 5.52   | -2.01  | 2.55   | 3.11  | 5.61  | 8.26  | 2.12   |
| NH | 39.74 | 0.20  | 9.90   | 3.84  | 8.49  | 8.16  | 11.15 | -5.53  | 0.35   | -0.09  | 7.76  | 18.00 | 6.88  | 2.66   |
| NJ | 73.25 | 0.10  | -3.38  | -4.18 | -1.22 | 7.08  | 3.99  | -9.22  | -10.01 | -16.13 | -4.15 | 5.06  | -1.75 | -3.62  |
| NM | 51.18 | 0.07  | -0.53  | 1.35  | 1.93  | 1.52  | -5.30 | -6.87  | -11.80 | -8.40  | -6.07 | 3.24  | 1.32  | -9.66  |
| NY | 57.21 | 0.00  | 3.08   | 3.44  | 5.12  | 7.45  | 7.69  | -2.12  | -7.03  | -9.90  | 0.23  | 7.17  | 6.13  | 4.04   |
| NC | 74.44 | 0.04  | -5.21  | -2.60 | 1.13  | 5.15  | -5.03 | -9.10  | -9.61  | -10.47 | -2.49 | 0.94  | 0.77  | -5.73  |
| ND | 8.29  | -0.05 | 6.22   | 0.05  | 4.50  | 5.17  | 3.01  | 0.71   | 3.06   | 6.29   | 1.92  | 2.27  | 7.73  | 4.79   |
| OH | 50.09 | 0.05  | -0.61  | 1.45  | 4.15  | 10.0  | 2.10  | -2.71  | -2.57  | -2.66  | 2.57  | 6.42  | 3.27  | -1.41  |
| OK | 47.43 | 0.13  | 7.67   | 9.41  | 7.08  | 9.96  | 2.45  | 3.14   | 3.14   | 7.37   | 12.1  | 11.51 | 7.66  | 2.27   |
| OR | 41.00 | -0.23 | -1.71  | 0.42  | 6.73  | 3.92  | 11.57 | 11.82  | -0.56  | -0.65  | 6.15  | 2.78  | 0.88  | -3.18  |
| PA | 66.30 | 0.10  | -4.80  | -2.94 | -1.10 | 4.99  | 1.12  | -6.37  | -8.97  | -9.78  | -0.76 | 5.71  | -0.21 | -6.30  |
| RI | 52.70 | 0.08  | -14.61 | -5.99 | -2.57 | 4.28  | -3.41 | -13.80 | -10.98 | -16.87 | -6.07 | 1.10  | -9.84 | -10.82 |
| SC | 41.38 | -0.08 | 2.31   | 5.67  | 6.36  | 8.23  | 2.60  | -3.13  | -5.09  | -4.33  | 1.37  | 5.68  | 3.29  | 0.66   |
| SD | 13.80 | -0.03 | 2.91   | 3.66  | 9.35  | 7.16  | 4.73  | 4.23   | 1.56   | 2.18   | 2.26  | 3.29  | 3.51  | -0.33  |
| TN | 65.42 | 0.08  | -11.31 | -6.03 | -6.32 | 8.95  | -7.26 | -10.38 | -13.09 | -6.63  | -0.82 | -6.65 | -6.78 | -9.28  |
| TX | 73.10 | -0.10 | 4.56   | 2.22  | 4.96  | 13.6  | 1.65  | -9.83  | -10.45 | -6.94  | 2.25  | 6.22  | 4.11  | -2.04  |
| UT | 56.92 | 0.05  | -3.00  | -5.14 | 3.93  | -0.90 | -4.96 | -6.57  | -11.50 | -7.32  | -3.27 | 1.85  | -6.75 | -8.76  |
| VT | 29.90 | -0.04 | 12.23  | 10.60 | 0.83  | 11.5  | 6.20  | 0.49   | -1.66  | -3.09  | 5.08  | 11.63 | 20.28 | 5.04   |
| VA | 77.71 | -0.32 | -2.12  | -0.68 | 5.15  | 12.8  | 7.04  | -3.16  | 2.38   | -1.00  | 7.60  | 3.32  | -0.06 | -0.78  |
| WA | 72.27 | 0.03  | -3.31  | 0.71  | 4.07  | 5.81  | 2.07  | -3.52  | -8.45  | -11.27 | -5.87 | -2.82 | -6.01 | -11.25 |
| WV | 35.61 | 0.08  | 3.74   | 8.13  | 14.29 | 13.0  | 5.31  | 4.06   | 5.54   | 2.53   | 7.07  | 11.44 | 9.41  | 6.47   |
| WI | 37.06 | -0.09 | 3.57   | 6.21  | 2.00  | 13.5  | 3.93  | 0.47   | 0.40   | -3.24  | 2.58  | 14.99 | 7.85  | 2.24   |
| WY | 13.31 | 0.07  | 9.10   | 5.16  | 7.87  | 6.86  | 3.00  | 3.92   | 3.04   | 6.00   | 1.38  | 8.21  | 5.36  | 4.46   |
